# Supplementary material
Source: publisher figshare collection journal article supplement (https://frontiersin.figshare.com/ndownloader/files/22443536)
Supplement: Supplementary file [file 22443536]

# Tracking of an oral *Salmonella*-based vaccine for type 1 diabetes in non-obese diabetic mice

Jacques C. Mbongue<sup>1</sup>, Ali Alhoshani<sup>2</sup>, Jeffery Rawson<sup>1</sup>, Pablo A. Garcia<sup>1</sup>, Nelson Gonzalez<sup>1</sup>, Kevin Ferreri<sup>1</sup>, Fouad Kandeel<sup>1</sup>, and Mohamed I. Hussein<sup>1,3,\*</sup>

<sup>1</sup>Department of Translational Research & Cellular Therapeutics, Diabetes & Metabolism Research, Institute, Beckman Research Institute of City of Hope National Medical Center, Duarte, California 91010-3000, USA

<sup>2</sup>Department of Pharmacology and Toxicology, College of Pharmacy, King Saud University, Riyadh, Saudi Arabia

<sup>3</sup>Faculty of Pharmacy, Zagazig University, Zagazig, Egypt

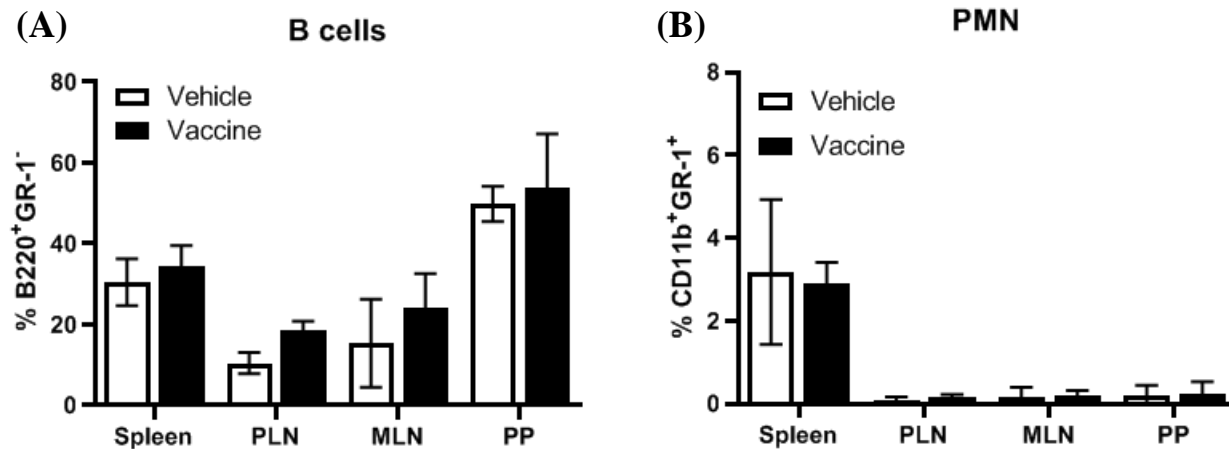

**Supplementary Figure 1: A *Salmonella*-based vaccine does not impact B cell and polymorph nuclear macrophage numbers in lymphoid organs.** NOD mice were injected with 2.5  $\mu$ g/mouse of anti-CD3 mAb for 5 days followed by 2 doses of oral combined PPI+TGF $\beta$ +IL10 vaccine (n=5). Four weeks post-vaccination, B cells and PMN were analyzed in different organs by FACS analysis. **(A)** Quantification of the percentage of B220<sup>+</sup>GR-1<sup>-</sup> (B cells) in total live cells of the spleen, PLN, MLN, and PP. **(B)** Quantification of the percentage of CD11b<sup>+</sup>GR-1<sup>+</sup> (PMN) in total live cells of the spleen, PLN, MLN, and PP. The data shown are the average with SD from 2 independent experiments. Statistical analysis using two-way ANOVA shows significance between vaccine and vehicle treated groups (\*p<0.01, \*\*\*P<0.001, \*\*\*\*p<0, 0001).
